# Supplementary material for: Formation of Hydrogen Sulfide in Wine: Interactions between Copper and Sulfur Dioxide
Source: MDPI journal article supplement (doi:10.3390/molecules21091214), 2016-09-10
Supplement: s1 [file s1]

# Supplementary Materials: Formation of Hydrogen Sulfide in Wine: Interactions between Copper and Sulfur Dioxide

Marlize Z. Bekker, Mark E. Smith, Paul A. Smith and Eric Wilkes

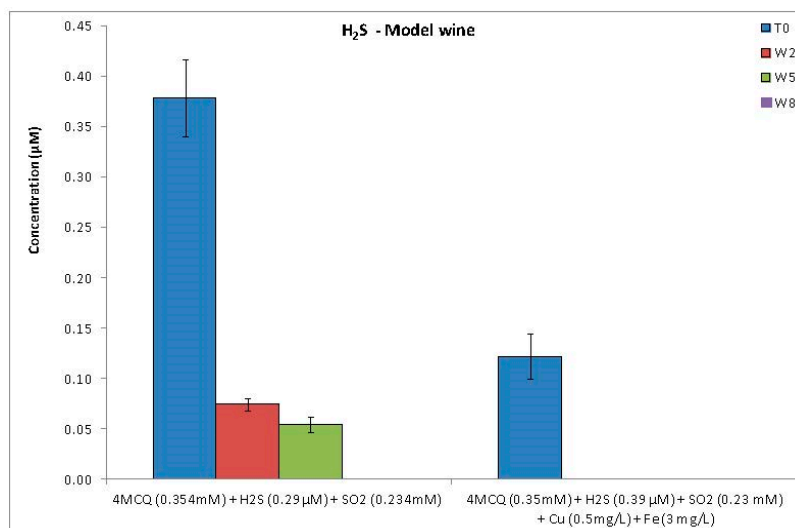

**Figure S1.** Residual H<sub>2</sub>S concentrations measured in samples that replicated wine-like conditions, with 4MBQ at 0.45 mM, H<sub>2</sub>S at 0.39 μM, and SO<sub>2</sub> 0.23 mM.; as well as the 4MBQ (0.45 mM), H<sub>2</sub>S (0.39 μM), and SO<sub>2</sub> (0.23 mM) with added Cu<sup>2+</sup> (0.5 mg/L) and Fe<sup>3+</sup> (4.0 mg/L).

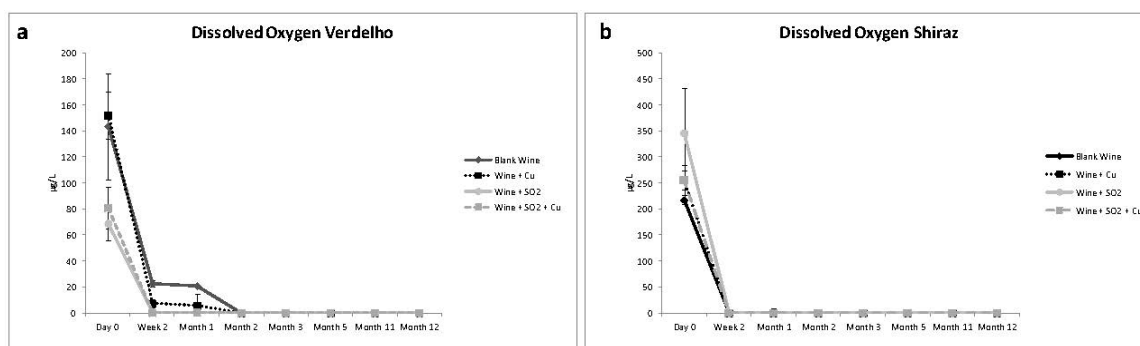

**Figure S2.** Dissolved oxygen consumption measured from day 0 to month 12 for (a) Verdelho samples and (b) Shiraz samples.
